# Supplementary material
Source: PubMed Central journal article supplement (PMC3668701)
Supplement: NIHMS465030-supplement-2.pdf [file NIHMS465030-supplement-2.pdf]

# Supplemental Figure 1:

A

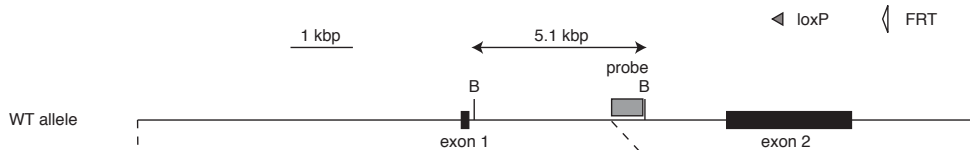

B

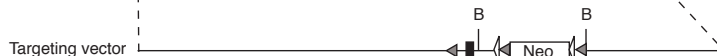

C

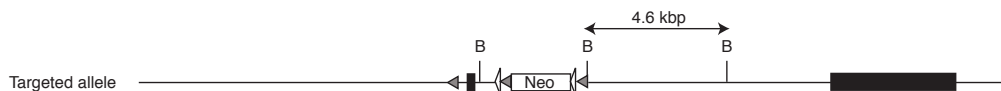

D

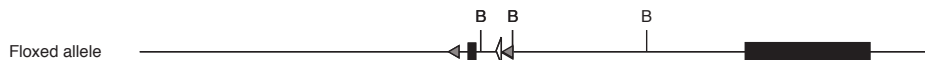

E

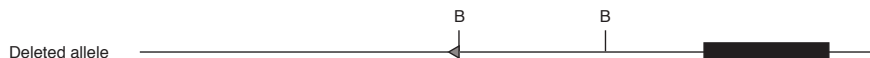

F.

ES clones

| 214 | 312 | 351 | 354 | wt  | wt | wt  |
|-----|-----|-----|-----|-----|----|-----|
|     |     |     |     | HYB | B6 | 129 |

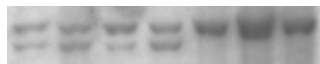

← WT (5.1 kbp)

← Targeted allele (4.6 kbp)

G.

```

AGTAGGTGCTGGGAAGGACAAGTTAATTTGGGATAAGGAACTGGAGTGTCAATGTT
GATGTGTCCTGTTAATGATCTTTTCAGTTAAATTGTCATCAGATAACCCGTTGGGTTCTG
GTATCCCTTTATTCTATTCTGTCTCCTTACTCCTACGACCTGGATGCTGTGCTGGACCA
GAGCAGGCCACTGATATGGTGGTATTTAGCAGCTGCAGAAAGGAACGAGTCACAGC
AGGAATGTGGTCTGAGCTGTGCTGGCTGGACCAAATCAAAGGGCTGGCACAAAAGC
CTGCTGGTTTCCCTGTTGCAAACATCTTTTCTGATGACGCTTCCAGCCTAAAGCTAGA
ATTTTATCTGGGATGTGGCAAGGACCCAGGTGTGAAACTGGAAGCTGTGGGCCATGT
TGCCCCTCTGTTCTGCATCACTGTGAGTGAAATATGGCTTAGTTTCCCATAGAACAGG
ATACTAGTCAACACATACGTATTCTTAGAGCTCTCTACTATGTCTCTGTCTACTGCTCC
TTCTGC
    
```
