# Supplementary material
Source: PubMed Central journal article supplement (PMC3668701)

# Supplemental Figure 2:

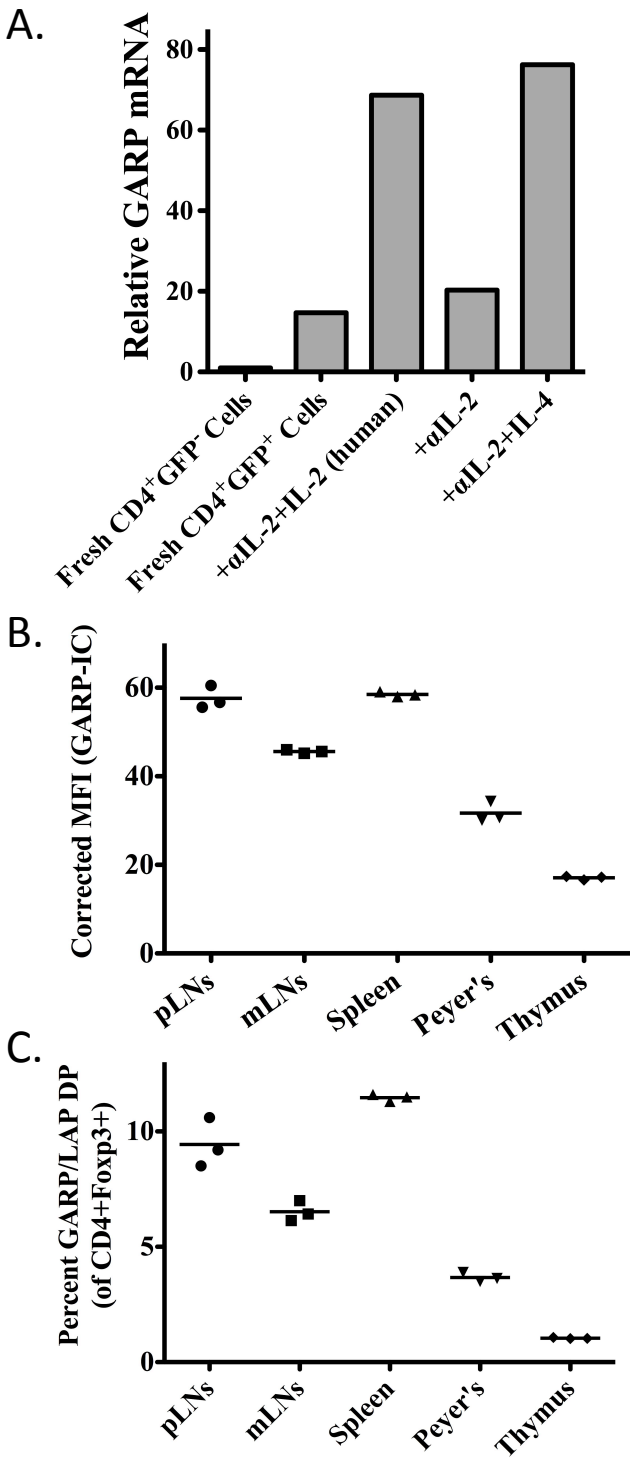

Supplement: NIHMS465030-supplement-3.pdf [file NIHMS465030-supplement-3.pdf]

# Supplemental Figure 4:

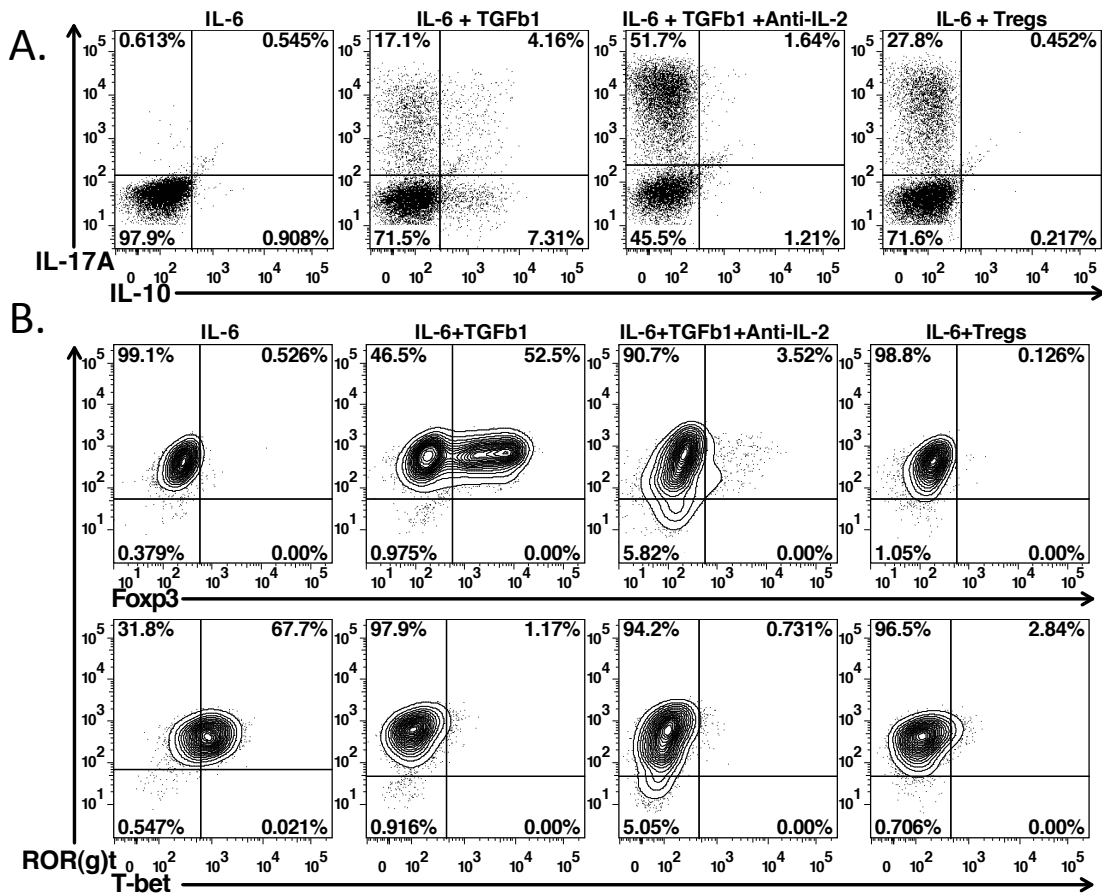

Supplement: NIHMS465030-supplement-5.pdf [file NIHMS465030-supplement-5.pdf]
